# Supplementary material
Source: PubMed Central journal article supplement (PMC3871857)
Supplement: NIHMS526015-supplement-01.pdf [file NIHMS526015-supplement-01.pdf]

## Figure S1. Cluster robustness, related to Figure 2.

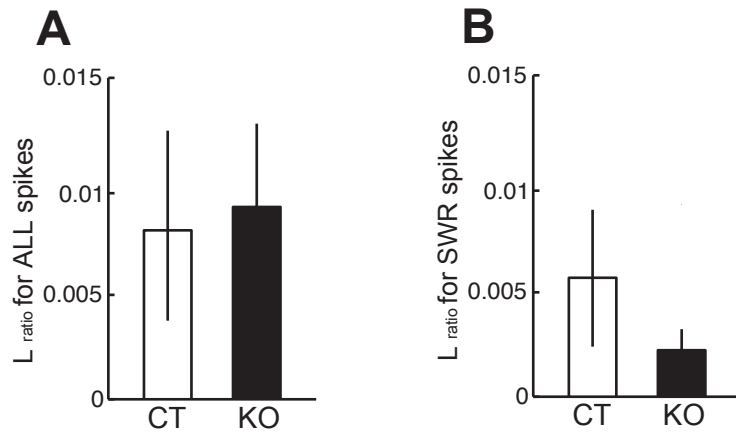

Figure S1. Cluster robustness is preserved in KO.  $L_{ratio}$  which is a measure of cluster robustness is not significantly different in KO and CT, either by (A) including all spikes of each place cell or (B) by including only spikes happening during SWRs. Data are represented as mean  $\pm$  SEM.
